# Supplementary material
Source: PubMed Central journal article supplement (PMC4788049)
Supplement: 774471.ww1_default.pdf [file 774471.ww1_default.pdf]

### **Primary care physicians participating in CAMBO**

**Belleville:** J. Allin, S. F. Blanchard, D. Cooke, W. Cunningham, R. Goodall, P. Grey, G Hamilton, L. Hayes, I. Kolabinski, D. Lisowski, J. Mason. L. Noranha, S. Prasad, M. Savic, D. Sherlock, W. Shipley, M. Simmons, S. Smith, P. Wilkins.

**Brantford:** D. Allen, S. Charlton, N. Chipman, A. M. Connelly, S. Elliott, M. A. Gorcsi, J. Hadley, L. Leach, D. Lowcock, J. Manning, B. McNeil, D. Spicer, E. Stahlbrand.

**Corner Brook:** P. Callahan, S. C. Ng, O. Fouda, R. Gingrich, T. Griffin, E. Guirguis, T. Parsons, M. Smallwood.

**Montreal:** R. Carlin, A. Czaharyn, D. Dalton, A. Dollois, A. Dowell, C. Garon, G. Gupta, P. Lysy, D. P. Nghiem, A. Pavilanis, E. Rosenberg, D. Sproule, M. Yaffe.

**St. John's:** C. Bethune, R. Butler, E. Callahan, D. Callahan-Dyer, E. Collis, N. Duggan, W. Eaton, J. Elliott, M. Fagan O'Dea, H. Flynn, M. Greene, L. Hayward, C. Kirby, K. Lake, S. Major, E. Mate, R. McCarthy, A. McCarthy, W. Mercer, M. Noseworthy, V. Patel, M. Penton, G. Rideout, M. Robbins, K. Saunders, G. Sherman, P. Skirving, K. Stringer, G. Tarrant, C. Thomas, C. Tulk, P. Walsh, H. Wight, H. Woodland, B. Woodland.
